# Supplementary material for: Growth of single-walled carbon nanotubes with large chiral angles on rhodium nanoparticles
Source: Royal Society of Chemistry journal article supplement (doi:10.1039/c3nr03259k), 2013-01-01
Supplement: c3nr03259k.pdf [file c3nr03259k.pdf]

## Supporting Information

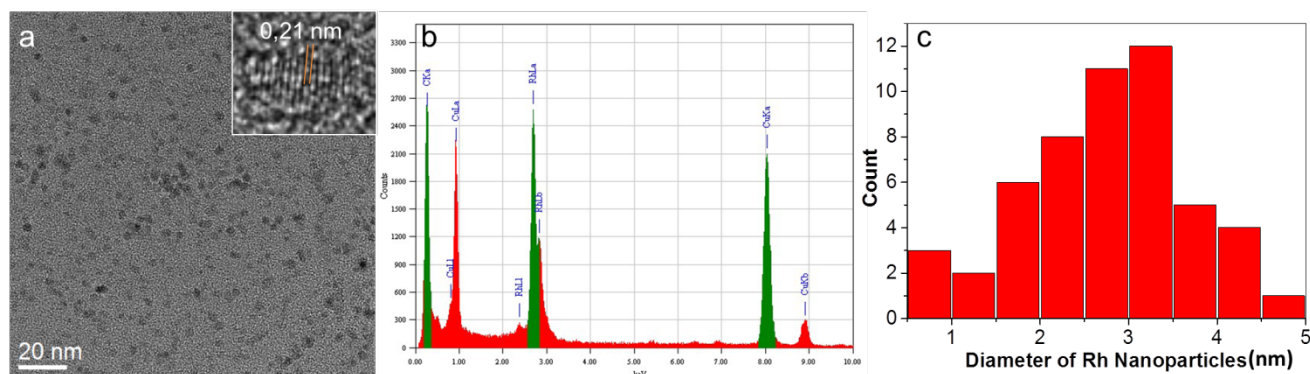

**Figure S1.** (a) A TEM overview of the Rh nanoparticles prepared through chemical reduction under microwave irradiation. Inset shows a nanoparticle with inter-planar spacing of 0.21 nm, corresponding to the [111] planes of Face-Centered Cubic Rh. (b) Energy-dispersive X-ray microanalysis of Rh nanoparticles. (c) Size distribution of the prepared Rh nanoparticles.

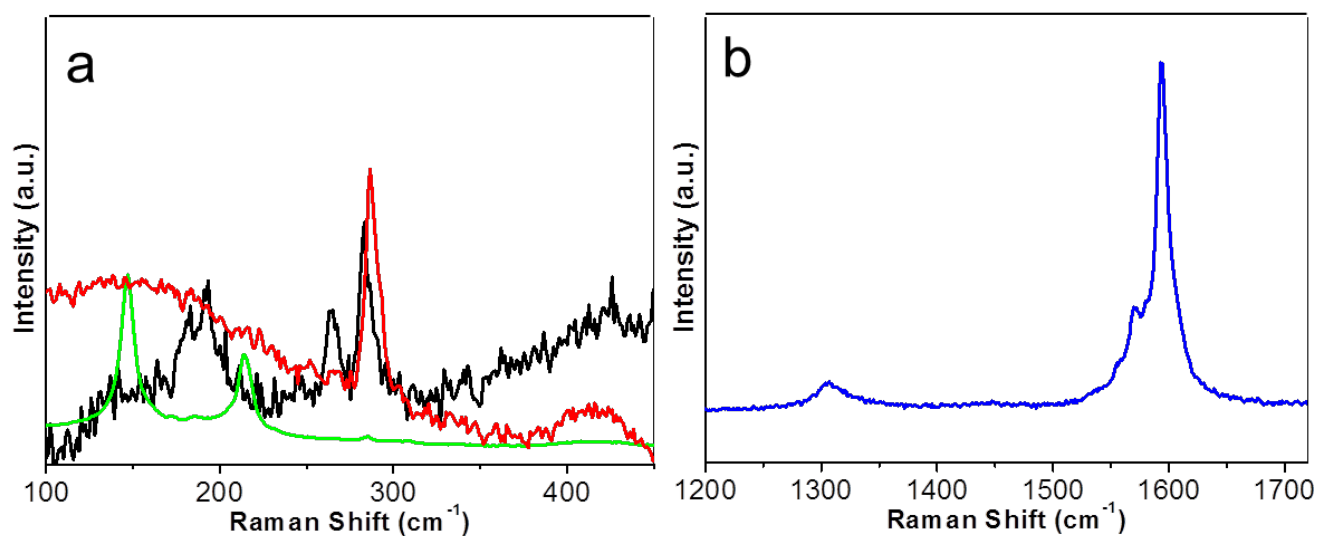

**Figure S2.** (a) Radial breathing modes of Raman spectra of SWNTs grown on Rh nanoparticles at 800 °C using CO as the carbon source. (b) A typical high frequency mode showing a relatively high intensity ratio of G to D mode.

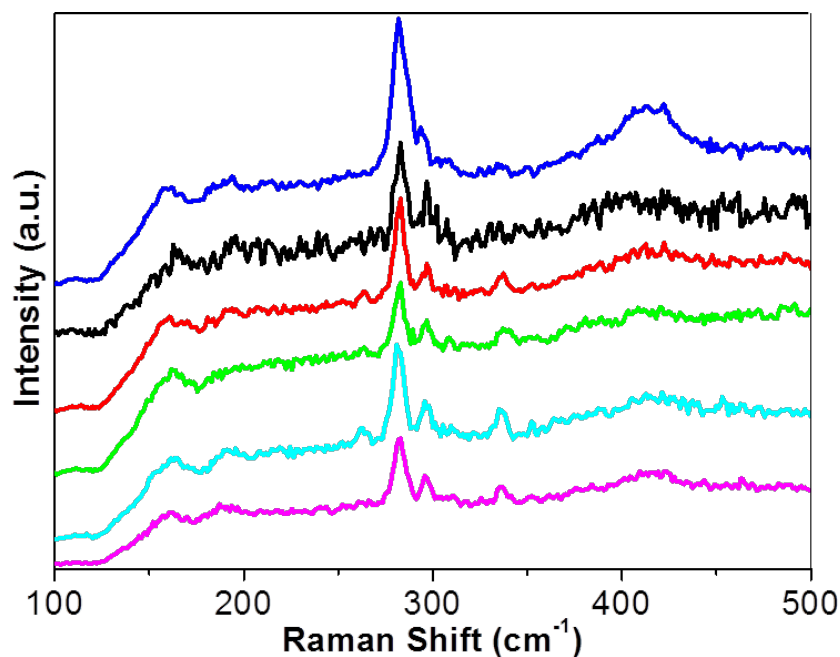

**Figure S3.** Radial breathing modes of Raman spectra of SWNTs grown on Rh nanoparticles at 700 °C using CO as the carbon source. The excitation wavelength is 633 nm and the spectra were taken from 6 different points on the sample.

**Table S1.** (n,m) resolved SWNTs synthesized on Rh catalyst using CO at 800 °C.

| Indices (n,m) | Chiral angle (°) | Diameter (nm) | Metallic(M)/Semiconducting(S) |
|---------------|------------------|---------------|-------------------------------|
| (6,5)         | 27               | 0.75          | S                             |
| (6,5)         | 27               | 0.75          | S                             |
| (6,5)         | 27               | 0.75          | S                             |
| (7,4)         | 21               | 0.76          | M                             |
| (7,4)         | 21               | 0.76          | M                             |
| (6,6)         | 30               | 0.81          | M                             |
| (6,6)         | 30               | 0.81          | M                             |
| (7,5)         | 24.5             | 0.82          | S                             |
| (9,3)         | 13.9             | 0.85          | M                             |
| (8,5)         | 22.4             | 0.89          | M                             |
| (12,0)        | 0                | 0.94          | M                             |
| (8,6)         | 25.3             | 0.95          | S                             |
| (7,7)         | 30               | 0.95          | M                             |
| (11,3)        | 11.7             | 1             | S                             |
| (8,7)         | 27.8             | 1.02          | S                             |
| (8,7)         | 27.8             | 1.02          | S                             |
| (8,7)         | 27.8             | 1.02          | S                             |
| (8,7)         | 27.8             | 1.02          | S                             |
| (9,6)         | 23.4             | 1.02          | M                             |

|         |      |      |   |
|---------|------|------|---|
| (12,2)  | 7.6  | 1.03 | S |
| (12,3)  | 10.9 | 1.08 | M |
| (9,7)   | 25.9 | 1.09 | S |
| (9,7)   | 25.9 | 1.09 | S |
| (9,7)   | 25.9 | 1.09 | S |
| (9,7)   | 25.9 | 1.09 | S |
| (8,8)   | 30   | 1.09 | M |
| (11,5)  | 17.8 | 1.11 | M |
| (11,5)  | 17.8 | 1.11 | M |
| (11,5)  | 17.8 | 1.11 | M |
| (14,1)  | 3.4  | 1.14 | S |
| (9,8)   | 28.1 | 1.15 | S |
| (13,3)  | 10.2 | 1.15 | S |
| (10,7)  | 24.2 | 1.16 | M |
| (10,7)  | 24.2 | 1.16 | M |
| (10,7)  | 24.2 | 1.16 | M |
| (11,6)  | 20.4 | 1.17 | S |
| (11,6)  | 20.4 | 1.17 | S |
| (11,6)  | 20.4 | 1.17 | S |
| (9,9)   | 30   | 1.22 | M |
| (9,9)   | 30   | 1.22 | M |
| (9,9)   | 30   | 1.22 | M |
| (9,9)   | 30   | 1.22 | M |
| (9,9)   | 30   | 1.22 | M |
| (10,8)  | 26.3 | 1.22 | S |
| (10,8)  | 26.3 | 1.22 | S |
| (10,8)  | 26.3 | 1.22 | S |
| (10,8)  | 26.3 | 1.22 | S |
| (10,8)  | 26.3 | 1.22 | S |
| (10,8)  | 26.3 | 1.22 | S |
| (15,1)  | 3.2  | 1.22 | S |
| (11,7)  | 22.7 | 1.23 | S |
| (11,7)  | 22.7 | 1.23 | S |
| (12,6)  | 19.1 | 1.24 | M |
| (12,6)  | 19.1 | 1.24 | M |
| (12,6)  | 19.1 | 1.24 | M |
| (16,0)  | 0    | 1.25 | S |
| (10,9)  | 28.2 | 1.29 | S |
| (11,8)  | 24.8 | 1.29 | M |
| (10,9)  | 28.2 | 1.29 | S |
| (12,7)  | 21.4 | 1.3  | S |
| (12,7)  | 21.4 | 1.3  | S |
| (13,7)  | 20.2 | 1.34 | M |
| (10,10) | 30   | 1.36 | M |
| (10,10) | 30   | 1.36 | M |

|         |      |      |   |
|---------|------|------|---|
| (10,10) | 30   | 1.36 | M |
| (11,9)  | 26.7 | 1.36 | S |
| (11,9)  | 26.7 | 1.36 | S |
| (11,9)  | 26.7 | 1.36 | S |
| (11,9)  | 26.7 | 1.36 | S |
| (12,9)  | 25.3 | 1.43 | M |
| (12,9)  | 25.3 | 1.43 | M |
| (11,10) | 28.4 | 1.43 | S |
| (11,10) | 28.4 | 1.43 | S |
| (11,10) | 28.4 | 1.43 | S |
| (11,11) | 30   | 1.49 | M |
| (13,9)  | 24   | 1.5  | S |
| (12,10) | 27   | 1.5  | S |
| (14,8)  | 21.1 | 1.51 | M |
| (12,11) | 28.5 | 1.56 | S |
| (14,9)  | 22.8 | 1.57 | S |
| (14,9)  | 22.8 | 1.57 | S |
| (15,8)  | 20   | 1.58 | S |
| (12,12) | 30   | 1.63 | M |
| (17,7)  | 16.5 | 1.67 | S |
| (13,12) | 28.7 | 1.7  | S |
| (15,10) | 23.4 | 1.71 | S |
| (18,7)  | 15.7 | 1.75 | S |
| (14,12) | 27.5 | 1.76 | S |
| (13,13) | 30   | 1.76 | M |
| (13,13) | 30   | 1.76 | M |
| (16,12) | 25.3 | 1.91 | S |
| (18,10) | 20.6 | 1.92 | S |
| (16,13) | 26.6 | 1.97 | M |
| (21,12) | 21.1 | 2.27 | M |
| (21,13) | 22.3 | 2.33 | S |
| (29,23) | 26.2 | 3.54 | M |
| (33,19) | 21.2 | 3.57 | S |

**Table S2.** (n,m) resolved SWNTs synthesized on Rh catalyst using methane at 800 °C.

| Indices (n,m) | Chiral angle (°) | Diameter (nm) | Metallic(M)/Semiconducting(S) |
|---------------|------------------|---------------|-------------------------------|
| (10,1)        | 4.7              | 0.83          | M                             |
| (7,7)         | 30               | 0.95          | M                             |
| (8,8)         | 30               | 1.09          | M                             |
| (9,8)         | 28.1             | 1.15          | M                             |
| (9,9)         | 30               | 1.22          | S                             |
| (10,10)       | 30               | 1.36          | M                             |
| (10,10)       | 30               | 1.36          | M                             |

|         |      |      |   |
|---------|------|------|---|
| (10,6)  | 21.8 | 1.10 | S |
| (10,7)  | 24.2 | 1.16 | M |
| (10,8)  | 26.3 | 1.22 | S |
| (10,8)  | 26.3 | 1.22 | S |
| (10,8)  | 26.3 | 1.22 | S |
| (11,5)  | 17.8 | 1.11 | M |
| (11,5)  | 17.8 | 1.11 | M |
| (11,7)  | 22.7 | 1.23 | S |
| (11,7)  | 22.7 | 1.23 | S |
| (11,7)  | 22.7 | 1.23 | S |
| (11,7)  | 22.7 | 1.23 | S |
| (11,7)  | 22.7 | 1.23 | S |
| (11,8)  | 24.8 | 1.29 | M |
| (11,8)  | 24.8 | 1.29 | M |
| (11,8)  | 24.8 | 1.29 | M |
| (11,8)  | 24.8 | 1.29 | M |
| (12,11) | 28.6 | 1.56 | S |
| (12,5)  | 16.6 | 1.19 | S |
| (12,9)  | 25.3 | 1.43 | M |
| (12,9)  | 25.3 | 1.43 | M |
| (13,13) | 30   | 1.76 | M |
| (13,2)  | 7.1  | 1.11 | S |
| (13,2)  | 7.1  | 1.11 | S |
| (13,2)  | 7.1  | 1.11 | S |
| (14,8)  | 21.1 | 1.51 | M |
| (14,8)  | 21.1 | 1.51 | M |
| (15,15) | 30   | 2.04 | M |
| (17,12) | 24.3 | 1.98 | S |
| (17,12) | 24.3 | 1.98 | S |
| (18,18) | 30   | 2.44 | M |
| (20,14) | 24.2 | 2.32 | M |
| (20,17) | 27.3 | 2.51 | M |
| (20,20) | 30   | 2.71 | M |
| (21,15) | 24.5 | 2.45 | M |
| (22,12) | 20.4 | 2.34 | S |
| (22,17) | 25.8 | 2.65 | M |
| (24,13) | 20.3 | 2.55 | S |
| (25,1)  | 1.9  | 2.00 | M |
| (25,10) | 16.1 | 2.45 | M |
| (26,9)  | 14.3 | 2.47 | S |
| (27,13) | 18.6 | 2.77 | S |
| (28,19) | 23.7 | 3.21 | S |
| (29,17) | 21.4 | 3.16 | M |
| (40,2)  | 2.4  | 3.21 | S |
